# Supplementary material
Source: MDPI journal article supplement (https://www.mdpi.com/2073-4441/15/23/4108)
Supplement: s1 [file s1]

## **Supplementary Material**

# **Factors Affecting the Morphology of Granular Sludge in Phosphorus-Accumulating Organism (PAO) and Denitrifying PAO (DPAO) Sequencing Batch Reactors**

**Geumhee Yun <sup>1</sup>, Zuwhan Yun <sup>1</sup>, Young Kim <sup>1</sup> and Kyungjin Han <sup>2,\*</sup>**

<sup>1</sup> Department of Environmental Engineering, Korea University,  
Sejong 30019, Republic of Korea; rmal9292@korea.ac.kr (G.Y.)

<sup>2</sup> Department of Environmental Engineering, Korea National University of  
Transportation, Chungju 27469, Republic of Korea

\* Correspondence: rudwls1009@ut.ac.kr; Tel.: +82-43-841-5356

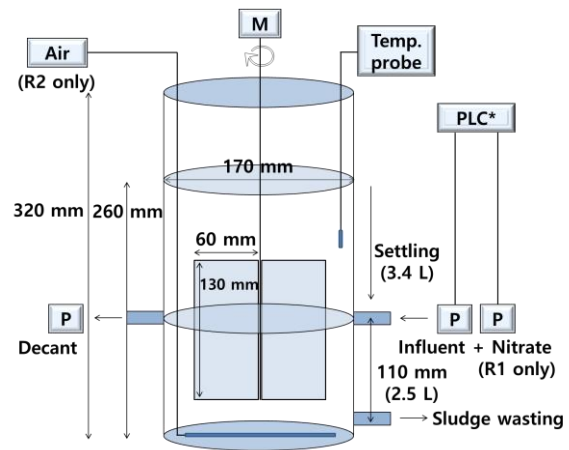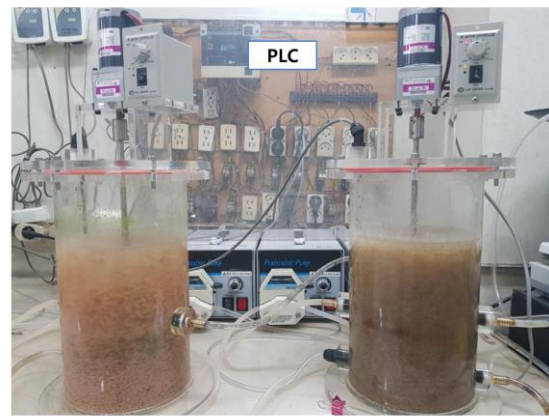

An-Ax (R1)

An-Ox (R2)

Figure. S1. Diagram(left) and image(right) of lab-scale SBRs

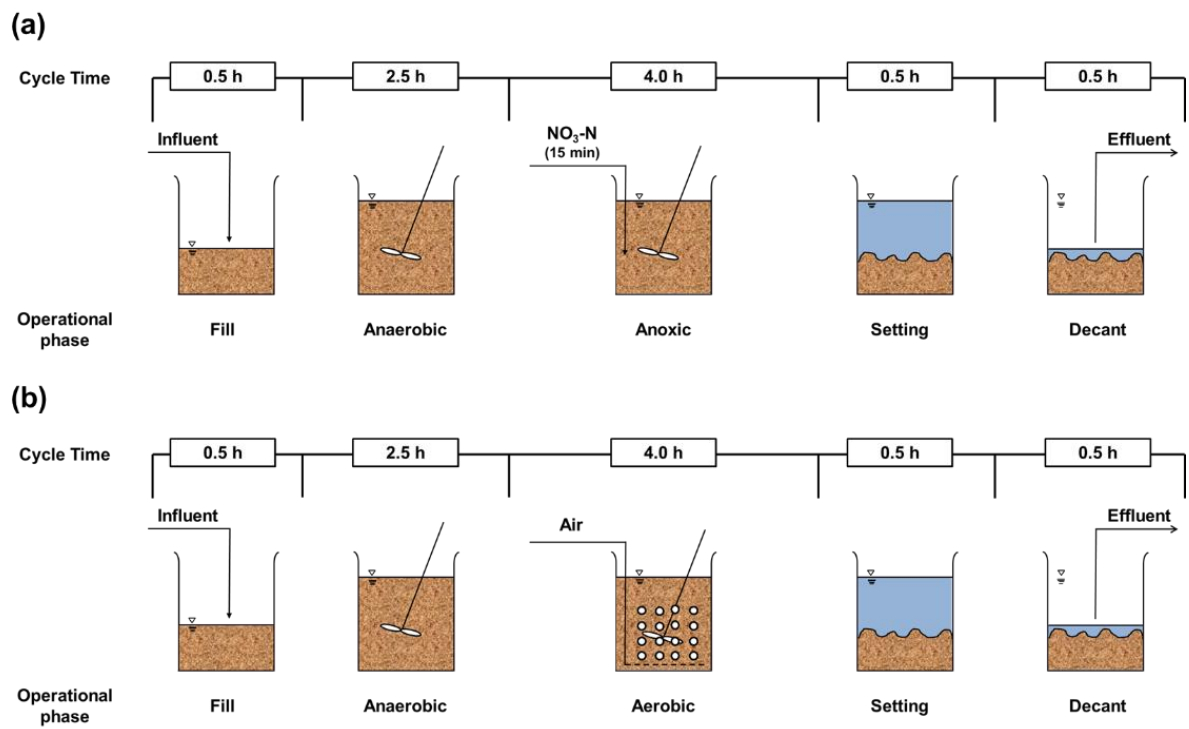

Figure. S2. Schematic of lab-scale SBRs operational condition for biological nutrient removal in (a) the An-Ax SBR and (b) the An-Ox SBR.

Table S1. Composition of synthetic wastewater

|                      | Chemicals                             | Concentration                                           |                                                         |
|----------------------|---------------------------------------|---------------------------------------------------------|---------------------------------------------------------|
|                      |                                       | An-Ax SBR                                               | An-Ox SBR                                               |
| Carbon source        | CH <sub>3</sub> CH <sub>2</sub> COONa | 0.15 g/L<br>(150 mg COD/L)                              | 0.15 g/L<br>(150 mg COD/L)                              |
| Nitrogen source      | KNO <sub>3</sub>                      | 7.21 g/L<br>(15 mg NO <sub>3</sub> <sup>-</sup> -N/L)   | -                                                       |
|                      | NH <sub>4</sub> Cl                    | 0.038 g/L<br>(10 mg NH <sub>4</sub> <sup>+</sup> -N/L)  | 0.095 g/L<br>(25 mg NH <sub>4</sub> <sup>+</sup> -N/L)  |
| Phosphorus source    | KH <sub>2</sub> PO <sub>4</sub>       | 0.0175 g/L<br>(6 mg PO <sub>4</sub> <sup>3-</sup> -P/L) | 0.0175 g/L<br>(6 mg PO <sub>4</sub> <sup>3-</sup> -P/L) |
| Trace metal solution | *                                     | 0.1 mL/L of influent                                    | 0.1 mL/L of influent                                    |

Table S2. Summary of 34 references and operating results of this study

| NO | Process | Condition | BNR type      | OLR<br>(kg/m <sup>3</sup> ·d) | SVI<br>(mL/g) | MLSS<br>(mg/L) | SRT<br>(day) | HRT<br>(h) | H/D<br>ratio | Settling time*<br>(min) | Aeration intensity<br>(cm/s) | F/M ratio | Granule size<br>(mm) | EPS conc.<br>(mg/g vss) | Reference                 |
|----|---------|-----------|---------------|-------------------------------|---------------|----------------|--------------|------------|--------------|-------------------------|------------------------------|-----------|----------------------|-------------------------|---------------------------|
| 1  | SBR     | Ox        | Nitrification | 6.0                           | 51-85         | 5,900          | 7            | 8.0        | 24           | 20                      | 2.5                          | 0.34      | 2.4                  |                         | Tay et al. (2001)         |
|    | SBR     | Ox        | Nitrification | 6.0                           | 50-80         | 8,600          | 9            | 8.0        | 24           | 20                      | 2.5                          | 0.23      | 1.1                  |                         |                           |
| 2  | SBAR    | Ox        | Nitrification | 2.5                           |               |                | 45           | 5.6        | 22.5         | 3                       | 2.2                          |           | 2.5                  |                         | Beun et al. (2002)        |
|    | SBAR    | Ox        | Nitrification | 4.6                           |               |                |              | 0.67       | 22.5         |                         | 2.2                          |           | 0.56                 |                         |                           |
|    | SBAR    | Ox        | Nitrification |                               |               |                |              | 1.0        | 22.5         |                         | 2.2                          |           | 0.75                 |                         |                           |
|    | SBAR    | Ox        | Nitrification | 1.0                           |               |                |              | 0.67       | 22.5         |                         | 2.2                          |           | 1.41                 |                         |                           |
| 3  | SBR     | Ox        | Nitrification |                               |               |                |              | 3.0        | 24           | 30                      | 3                            |           | 0.12                 |                         | Tay et al. (2002)         |
|    | SBR     | Ox        | Nitrification |                               |               |                |              | 6.0        | 24           | 30                      | 3                            |           | 0.22                 |                         |                           |
|    | SBR     | Ox        | Nitrification |                               |               |                |              | 12.0       | 24           | 30                      | 3                            |           | 0.24                 |                         |                           |
|    | SBR     | Ox        | Nitrification |                               |               |                |              | 24.0       | 24           | 30                      | 3                            |           | 0.08                 |                         |                           |
| 4  | SBR     | An/Ox     | PAO           | 1.3                           | 70            | 3,400          | 10           |            |              | 30                      |                              | 0.19      | 2.75                 |                         | Dulekgurgen et al. (2003) |
| 5  | SBR     | Ox/Ax     | Nitrification | 2.5                           | 70-90         | 6,000          |              | 15.0       | 15           | 45                      | 0.42                         | 0.11      | 1.15                 |                         | Jang et al. (2003)        |
| 6  | SBR     | An/Ox     | PAO           |                               | 33            |                |              | 12.0       | 24.0         | 5                       | 2.5                          |           | 1.65                 |                         | Lin et al. (2003)         |
|    | SBR     | An/Ox     | PAO           |                               | 32            |                |              | 12.0       | 24.0         | 5                       | 2.5                          |           | 1.22                 |                         |                           |
|    | SBR     | An/Ox     | PAO           |                               | 25            |                |              | 12.0       | 24.0         | 5                       | 2.5                          |           | 1.03                 |                         |                           |
|    | SBR     | An/Ox     | PAO           |                               | 20            |                |              | 12.0       | 24.0         | 5                       | 2.5                          |           | 0.6                  |                         |                           |
|    | SBR     | An/Ox     | PAO           |                               | 12            |                |              | 12.0       | 24.0         | 5                       | 2.5                          |           | 0.42                 |                         |                           |
| 7  | SBR     | An/Ox     | PAO           | 0.9                           | 80            | 2,980          |              | 5.0        | 2.5          | 30                      |                              | 0.13      | 0.1                  |                         | Kim et al. (2004)         |
|    | SBR     | An/Ax/Ox  | PAO, dPAO     | 0.9                           | 80            | 2,980          |              | 5.0        | 2.5          | 30                      |                              | 0.13      |                      |                         |                           |
|    | SBR     | An/Ax/Ox  | PAO, dPAO     | 0.9                           | 65            | 2,980          |              | 5.0        | 2.5          | 30                      |                              | 0.13      | 2.5                  |                         |                           |
|    | SBR     | An/Ax/Ox  | PAO, dPAO     | 0.9                           | 95            | 2,980          |              | 5.0        | 2.5          | 30                      |                              | 0.13      |                      |                         |                           |
| 8  | SBR     | Ox        | Nitrification | 2.4                           | 46            | 9,000          |              |            | 11.1         | 2                       | 1.2                          |           | Compact              |                         | McSwain et al. (2004a)    |
|    | SBR     | Ox        | Nitrification | 2.4                           | 60            | 6,800          |              |            | 11.1         | 2                       | 1.2                          |           | loose                |                         |                           |
|    | SBR     | Ox        | Nitrification | 2.4                           | 114           | 3,200          |              |            | 11.1         | 2                       | 1.2                          |           | loose                |                         |                           |
| 9  | SBR     | Ox        | Nitrification | 2.4                           | 60            | 3,000          |              |            |              | 10                      | 1.2                          |           | 0.8                  | 58                      | McSwain et al. (2004b)    |
|    | SBR     | Ox        | Nitrification | 2.4                           | 63            | 8,800          |              |            |              | 2                       | 1.2                          |           | 3.0                  | 82                      |                           |
| 10 | SBR     | Ox        | Nitrification | 2.5                           |               |                |              | 6.0        | 13.3         | 20                      | 2.4                          |           | 0.51                 |                         | Yang et al. (2004)        |
|    | SBR     | Ox        | Nitrification | 2.5                           |               |                |              | 6.0        | 13.3         | 20                      | 2.4                          |           | 0.32                 |                         |                           |
|    | SBR     | Ox        | Nitrification | 2.5                           |               |                |              | 6.0        | 13.3         | 20                      | 2.4                          |           | 0.25                 |                         |                           |
|    | SBR     | Ox        | Nitrification | 2.5                           |               |                |              | 6.0        | 13.3         | 20                      | 2.4                          |           | 0.1                  |                         |                           |
|    | SBR     | Ox        | Nitrification | 2.5                           |               |                |              | 6.0        | 13.3         | 20                      | 2.4                          |           | 0.1                  |                         |                           |
| 11 | SBR     | Ox        | Nitrification | 4.14                          | 53            | 10,000         |              | 7.0        |              | 1                       |                              | 0.12      | 2.5                  |                         | Yun et al (2004)          |
| 12 | SBR     | Ox        | Nitrification | 2.4                           | 60            | 3,000          |              | 4.0        | 11.1         | 10                      | 1.2                          | 0.27      |                      | 58                      | McSwain et al. (2005)     |

|    |      |          |               |      |        |       |      |      |      |     |      |      |      |       |                                    |
|----|------|----------|---------------|------|--------|-------|------|------|------|-----|------|------|------|-------|------------------------------------|
|    | SBR  | Ox       | Nitrification | 2.4  | 63     | 8,800 |      | 4.0  | 11.1 | 2   | 1.2  | 0.09 | 2.0  | 84    |                                    |
| 13 | SBR  | Ax/Ox    | Nitrification |      |        |       | 20   | 12.0 |      | 45  |      |      | 0.55 |       | Carvalho et al. (2006)             |
| 14 | SBAR | Ox       | Nitrification | 1.0  |        |       |      | 5.6  | 14.4 |     | 2.5  |      | 1.1  |       | de Kreuk and Van Loosdrecht.(2006) |
| 15 | SBR  | Ox       | Nitrification | 4.0  |        |       |      | 8.0  | 1.4  | 3   | 0.4  |      | 2.0  |       | Sun et al. (2006)                  |
|    | SBR  | Ox       | Nitrification | 4.0  |        |       |      | 8.0  | 1.4  | 3   | 0.4  |      |      |       |                                    |
|    | SBR  | Ox       | Nitrification | 4.0  |        |       |      | 8.0  | 1.4  | 3   | 0.4  |      | 0.5  |       |                                    |
|    | SBR  | Ox       | Nitrification | 4.0  |        |       |      | 8.0  | 1.4  | 3   | 0.4  |      |      |       |                                    |
| 16 | SBR  | Ox       | Nitrification | 4.0  | 43     | 7,800 | 20   | 4.5  | 17.0 | 5   |      | 0.10 | 1.5  | 48    | Wang et al. (2006)                 |
| 17 | SBR  | Ox       | Nitrification |      | 52     |       |      |      | 13.0 |     | 0.6  |      | 0.35 | 201.2 | Adav et al. (2007)                 |
|    | SBR  | Ox       | Nitrification |      | 35     |       |      |      | 13.0 |     | 1.2  |      | 3.25 | 591.3 |                                    |
|    | SBR  | Ox       | Nitrification |      | 61     |       |      |      | 13.0 |     | 1.8  |      | 1.25 | 637   |                                    |
| 18 | SBR  | Ox       | Nitrification | 6.0  | 50.3   |       |      | 8.0  |      | 5   |      |      | 0.4  | 39    | Zheng and Yu. (2007)               |
|    | SBR  | Ox       | Nitrification | 6.0  | 46.8   |       |      | 8.0  |      | 5   |      |      | 0.75 | 53    |                                    |
|    | SBR  | Ox       | Nitrification | 6.0  | 45.1   |       |      | 8.0  |      | 5   |      |      | 1.2  | 57    |                                    |
| 19 | SBR  | An/Ox    | PAO           | 1.6  |        | 3,400 | 9    | 1.18 |      | 10  | 0.24 | 0.24 | 0.62 |       | Dulekgurgen et al. (2008)          |
|    | SBR  | An/Ox    | PAO           | 1.6  |        | 3,000 | 9    | 1.18 |      | 5   | 0.49 | 0.27 |      | 252.7 |                                    |
|    | SBR  | An/Ox    | PAO           | 1.6  |        | 850   | 9    | 1.18 |      | 3   | 1.76 | 0.94 |      | 162.4 |                                    |
| 20 | SBR  | Ox       | Nitrification |      | 50     | 2,500 | 3    |      | 25.4 | 30  | 2.5  | 0.20 | 0.3  |       | Li et al. (2008b)                  |
|    | SBR  | Ox       | Nitrification |      | 50     | 3,400 | 6    |      | 25.4 | 30  | 2.5  | 0.15 | 0.23 |       |                                    |
|    | SBR  | Ox       | Nitrification |      | 50     | 4,500 | 9    |      | 25.4 | 30  | 2.5  | 0.11 | 0.23 |       |                                    |
|    | SBR  | Ox       | Nitrification |      | 50     | 5,500 | 12   |      | 25.4 | 30  | 2.5  | 0.09 | 0.21 |       |                                    |
|    | SBR  | Ox       | Nitrification |      | 50     | 8,000 | 40   |      | 25.4 | 30  | 2.5  | 0.06 | 0.18 |       |                                    |
| 21 | SBR  | Ox       | Nitrification | 8.0  | 60     | 9,000 |      | 3.0  | 20.0 | 5   | 2.4  | 0.11 | 1.5  |       | Liu and Tay. (2008)                |
|    | SBR  | Ox       | Nitrification | 3.0  | 30     | 7,000 |      | 8.0  | 20.0 | 5   | 2.4  | 0.14 | 0.9  |       |                                    |
|    | SBR  | Ox       | Nitrification | 1.5  | 50     | 3,000 |      | 16.0 | 20.0 | 5   | 2.4  | 0.33 | 0.6  |       |                                    |
| 22 | SBR  | Ox       | Nitrification | 2.4  |        | 6,000 |      |      |      | 2   | 1.2  |      |      |       | McSwain and Irvine (2008)          |
|    | SBR  | Ox       | Nitrification | 2.4  |        |       |      |      |      | 2   | 1.2  |      |      |       |                                    |
| 23 | SBR  | Ox       | Nitrification | 3.0  |        |       |      | 4.0  | 13.3 | 2   | 2.4  |      | 0.5  | 142.6 | Xiao et al. (2008)                 |
| 24 | SBR  | Ox       | Nitrification |      |        |       |      | 0.5  | 5.5  |     |      |      | 0.9  |       | Belmonte et al. (2009)             |
| 25 | SBR  | Ox       | Nitrification | 1.8  | 20     |       |      |      |      |     |      |      | 1.8  | 106   | Li et al. (2009)                   |
|    | SBR  | Ox       | Nitrification | 1.8  | 20     |       |      |      |      |     |      |      | 2.9  | 141.4 |                                    |
| 26 | SBR  | Ox       | Nitrification |      | 17     | 3,100 | 12.5 | 24.0 | 1.7  | 10  | 0.07 | 0.97 | 0.55 |       | Wan et al. (2009)                  |
|    | SBR  | Ox       | Nitrification |      | 33     | 3,100 | 12.5 | 24.0 | 1.7  | 10  | 0.07 | 0.97 | 0.55 |       |                                    |
| 27 | SBR  | An/Ax/Ox | PAO, dPAO     | 0.76 | 59     |       | 12   | 19.5 | 1.6  | 1.8 |      |      | 0.8  |       | Coma et al. (2010)                 |
| 28 | SBR  | Ox       | Nitrification | 2.0  | 46     | 4,000 | 10   |      | 8.3  | 2   | 0.66 | 0.25 | 1.0  | 35    | Sheng et al. (2010)                |
|    | SBR  | Ox       | Nitrification | 2.0  | 48     | 5,000 | 10   |      | 8.3  | 2   | 0.70 | 0.20 | 2.2  | 45    |                                    |
| 29 | SBR  | An/Ox    | PAO           |      | 80-100 | 4,500 | 16   | 8.0  | 6.0  | 35  | 0.42 | 0.07 | 0.74 | 115.3 | Wu et al. (2010)                   |

|    |      |       |               |      |      |       |    |      |      |    |      |      |      |       |                                               |
|----|------|-------|---------------|------|------|-------|----|------|------|----|------|------|------|-------|-----------------------------------------------|
| 30 | SBAR | Ax/Ox | dPAO          | 2.82 | 15   |       |    | 8.5  | 7.0  | 30 |      |      | 0.8  |       | Angela et al. (2011)                          |
| 31 | SBR  | Ox    | Nitrification | 0.45 | 50   |       | 56 |      | 2.1  | 5  | 0.6  |      | 1.9  |       | Cydzik-Kwiatkowska and Wojnowska-Baryła(2011) |
| 32 | SBR  | Ox    | Nitrification |      | 27   | 2,000 | 15 |      | 4.23 | 30 |      | 0.3  | 1.5  | 80    | Li et al. (2011)                              |
|    | SBR  | Ox    | Nitrification |      | 36.8 | 2,000 | 8  |      | 4.23 | 30 |      | 0.7  | 2.8  | 75    |                                               |
|    | SBR  | Ox    | Nitrification |      | 42.5 | 2,000 | 5  |      | 4.23 | 30 |      | 1.1  | 4.5  | 100   |                                               |
|    | SBR  | Ox    | Nitrification |      | 29.2 | 2,000 | 15 |      | 4.23 | 30 |      | 1.1  | 3    | 85    |                                               |
| 33 | SBR  | An/Ox | PAO           | 0.8  | 27.5 |       |    | 8.0  |      | 10 |      |      | 0.6  |       | Zhang et al. (2011)                           |
| 34 | SBAR | Ox    | Nitrification | 2.4  | 100  | 9,420 |    |      | 12.8 | 5  | 2.4  |      | 1.78 | 30.3  | Zhu et al. (2012)                             |
|    | SBAR | Ox    | Nitrification | 0.8  | 100  | 8,530 |    |      | 12.8 | 5  | 2.4  |      | 1.19 | 35.2  |                                               |
| 35 | SBR  | An/Ox | PAO           | 0.74 | 84   | 2,812 | 34 | 13.9 | 1.9  | 30 | 1.46 | 0.09 | 0.41 | 23.93 | This study                                    |
| 36 | SBR  | An/Ax | dPAO          | 0.74 | 97   | 2,226 | 40 | 13.9 | 1.9  | 30 |      | 0.12 | 2.2  | 36.7  | This study                                    |

Note - SBR: sequencing batch reactor SBAR: sequencing batch airlift reactor \*Settling time in one SBR operation
